Dennis M. Fisher, M.D., Editor

Anesthesiology  
2000; 93:858-75  
© 2000 American Society of Anesthesiologists, Inc.  
Lippincott Williams & Wilkins, Inc.

## Local Anesthetics and the Inflammatory Response

### A New Therapeutic Indication?

Markus W. Hollmann, M.D.,\* and Marcel E. Durieux, M.D., Ph.D.†

LOCAL anesthetics (LA) are known for their ability to block Na<sup>+</sup> channels. However, they have significant effects in several settings other than local and regional anesthesia or antiarrhythmic treatment, the areas in which they are used traditionally. These effects result from LAs interacting with other cellular systems as well. Interestingly, some of these effects occur at concentrations much lower than those required for Na<sup>+</sup> channel blockade. For example, whereas the half-maximal inhibitory concentration (IC<sub>50</sub>) of lidocaine at the neuronal Na<sup>+</sup> channel is approximately 50–100 μM (depending on the specific channel subtype and study preparation),<sup>1</sup> the compound inhibits signaling through m1 muscarinic receptors (expressed recombinantly in *Xenopus laevis* oocytes) with an IC<sub>50</sub> of 20 nM, that is, 1,000- to 5,000-fold lower.<sup>2</sup> This sensitivity of other targets has two important consequences. First, we assume that LAs, at

concentrations that result in significant Na<sup>+</sup> channel blockade, also affect a number of other systems. Second, relatively low LA concentrations (such as attained in blood during epidural anesthesia or analgesia or during intravenous LA infusion) that block neuronal Na<sup>+</sup> channels to a limited extent only still can have significant pharmacologic effects. We suggest that some of these “alternative actions” may be beneficial in the clinical setting, and others may be responsible for some adverse effects of LAs. Although Butterworth and Strichartz<sup>3</sup> a decade ago urged investigation of such actions and their mechanisms, much remains to be discovered. To demonstrate the variety of LA effects, table 1 provides an overview of various LA actions reported in the literature.

This review focuses on an area in which alternative actions of LAs show much promise for clinical application: their effects on the inflammatory response and especially on inflammatory cells (mainly polymorphonuclear granulocytes [PMNs] but also macrophages and monocytes). PMNs do not express Na channels,<sup>4</sup> and LA effects on these cells therefore are not caused by Na channel blockade. LA effects on these cells are not affected by Na channel blockers such as tetrodotoxin or veratridine.<sup>5</sup> Overactive inflammatory responses that destroy rather than protect are critical in the development of a number of perioperative disease states, such as postoperative pain,<sup>6–8</sup> adult respiratory distress syndrome (ARDS),<sup>9–11</sup> systemic inflammatory response syndrome, and multiorgan failure.<sup>12–15</sup> Perioperative modulation of such responses is therefore relevant to the practice of anesthesiology, and LAs may play significant roles in this regard.

### Inflammatory Response

In general terms, inflammation can be described as a reaction of the host against injurious events such as

\* Research Fellow.

† Associate Professor of Anesthesiology and Neurological Surgery and Assistant Professor of Pharmacology.

Received from the Department of Anesthesiology, University of Virginia, Charlottesville, Virginia. Submitted for publication August 27, 1999. Accepted for publication April 26, 2000. Support (to Dr. Hollmann) provided in part by the Department of Anesthesiology (Direktor: Univ.-Prof. Dr. E. Martin), University of Heidelberg, Germany, and by a grant from the German Research Society (DFG HO 2199/1-1), Bonn, Germany. Supported in part by an American Heart Association grant (VHA 9920345U), Mid-Atlantic Affiliation, Baltimore, Maryland, to Dr. Hollmann and VA and National Institutes of Health grant GMS 52387, Bethesda, Maryland.

Address reprint requests to Marcel E. Durieux, M.D., Ph.D., Department of Anesthesiology, University of Virginia Health Sciences Center, P.O. Box 10010, Charlottesville, Virginia 22906-0010. Address electronic mail to: durieux@virginia.edu

Individual article reprints may be purchased through the Journal Web site, [www.anesthesiology.org](http://www.anesthesiology.org)

Key words: Inflammation; leukocytes.

## LOCAL ANESTHETICS AND THE INFLAMMATORY RESPONSE

**Table 1. Overview of Reported Local Anesthetic Effects**

|                                                           |                                                                                                                                                                                                                           |
|-----------------------------------------------------------|---------------------------------------------------------------------------------------------------------------------------------------------------------------------------------------------------------------------------|
| <b>Antinociceptive Effects</b>                            |                                                                                                                                                                                                                           |
|                                                           | Blockade of neuronal sodium channels <sup>3</sup>                                                                                                                                                                         |
|                                                           | Blockade of potassium currents ( $K_A$ ) <sup>134</sup>                                                                                                                                                                   |
|                                                           | Blockade of presynaptic muscarinic receptors <sup>135</sup>                                                                                                                                                               |
|                                                           | Blockade of dopamine receptors <sup>136</sup>                                                                                                                                                                             |
| <b>Antiarrhythmic Effects</b>                             |                                                                                                                                                                                                                           |
|                                                           | Blockade of cardiac sodium channels <sup>137</sup>                                                                                                                                                                        |
| <b>Wound-healing Effects</b>                              |                                                                                                                                                                                                                           |
|                                                           | Retardation by reduction of mucopolysaccharide–collagen synthesis; <sup>138</sup> proposed mechanisms: changes in cell membrane stability, $Na^+$ conductance, intracellular $Ca^{2+}$ movement <sup>139</sup>            |
|                                                           | No substantial effect (no differences in breaking strength) <sup>140</sup>                                                                                                                                                |
|                                                           | Reduction in recruitment and metabolic response of PMN, without affecting viability <sup>141</sup>                                                                                                                        |
| <b>Antithrombotic Effects</b>                             |                                                                                                                                                                                                                           |
| <i>Clinical Studies</i>                                   |                                                                                                                                                                                                                           |
|                                                           | Reduction of deep venous thrombosis <sup>142,143</sup>                                                                                                                                                                    |
|                                                           | Reduction in platelet aggregation <sup>144</sup>                                                                                                                                                                          |
|                                                           | Reduction in MA of TEG <sup>145</sup>                                                                                                                                                                                     |
| <i>Animal Studies</i>                                     |                                                                                                                                                                                                                           |
|                                                           | Inhibition of thrombus formation in hamsters <sup>146</sup>                                                                                                                                                               |
|                                                           | Antithrombotic activity in canine model <sup>147</sup>                                                                                                                                                                    |
| <i>In Vitro Studies</i>                                   |                                                                                                                                                                                                                           |
|                                                           | Inhibition of platelet aggregation via blockade of $Ca^{2+}$ influx or mobilization of intracellular $Ca^{2+}$ stores <sup>148</sup>                                                                                      |
|                                                           | Prolongation of ACT, modification of TEG parameters <sup>149</sup>                                                                                                                                                        |
|                                                           | Contradictions: concentrations required are greater than clinically used <sup>150–152</sup>                                                                                                                               |
| <b>Effects on CNS Function</b>                            |                                                                                                                                                                                                                           |
|                                                           | Inhibition of postsynaptic nicotinic ACh receptor in spinal cord <sup>153–155</sup>                                                                                                                                       |
|                                                           | Inhibition of presynaptic $Ca^{2+}$ channels in spinal cord <sup>156,157</sup>                                                                                                                                            |
|                                                           | Increase of synaptic dopamine concentrations <sup>158</sup>                                                                                                                                                               |
|                                                           | Enhancement of GABAergic neurotransmission <sup>159,160</sup>                                                                                                                                                             |
|                                                           | Inhibition opiate receptor <sup>161</sup>                                                                                                                                                                                 |
|                                                           | Inhibition $\alpha$ -adrenoceptor <sup>162</sup>                                                                                                                                                                          |
|                                                           | Inhibition cholinergic muscarinic receptors <sup>163</sup>                                                                                                                                                                |
|                                                           | Inhibition substance P binding to NK-1 receptor <sup>164</sup>                                                                                                                                                            |
| <b>LA and Brain Injury</b>                                |                                                                                                                                                                                                                           |
| <i>In Vitro Studies</i>                                   |                                                                                                                                                                                                                           |
|                                                           | Inhibition of hypoxia-induced increases in $[Ca^{2+}]_i$ ; <sup>165,166</sup> proposed mechanism: inhibition of $IP_3$ receptor-mediated $Ca^{2+}$ release <sup>165</sup>                                                 |
|                                                           | Inhibition of ryanodine-mediated $Ca^{2+}$ release <sup>166</sup>                                                                                                                                                         |
|                                                           | Depression of synaptic function <sup>167</sup>                                                                                                                                                                            |
| <i>In Vivo Studies</i>                                    |                                                                                                                                                                                                                           |
|                                                           | Prolongation of the onset of anoxic depolarization and suppression of its amplitude; <sup>165,166</sup> proposed mechanism: inhibition of release of EAA by blockade of $Na^+$ channels <sup>168</sup>                    |
|                                                           | Reduction of cortical hypoperfusion and posttraumatic motor deficits (pretreatment, <sup>169</sup> posttraumatic administration <sup>170</sup> ); proposed mechanism: oxygen radical scavenging action <sup>171</sup>     |
|                                                           | Depression of cerebral oxygen and glucose consumption <sup>172</sup>                                                                                                                                                      |
| <b>LA and Bronchial Hyperreactivity</b>                   |                                                                                                                                                                                                                           |
| <i>Animal Model</i>                                       |                                                                                                                                                                                                                           |
|                                                           | Prevention of histamine, not ACh-induced bronchoconstriction <sup>173</sup>                                                                                                                                               |
| <i>In Humans</i>                                          |                                                                                                                                                                                                                           |
|                                                           | Blockade of reflex-induced airway hyperresponsiveness in subjects with asthma <sup>174,175</sup>                                                                                                                          |
|                                                           | Attenuation of the hyperreactive response to inhaled ACh; <sup>176</sup> proposed mechanism: attenuation of nerve conduction and reflex arches, block of neurally mediated reflex bronchoconstriction via the vagus nerve |
| <b>Treatment of Intractable Hiccups<sup>177,178</sup></b> |                                                                                                                                                                                                                           |
|                                                           | Proposed mechanism: anesthesia of sensory or irritated afferents                                                                                                                                                          |
| <b>Tinnitus Remission<sup>179</sup></b>                   |                                                                                                                                                                                                                           |

PMN = polymorphonuclear granulocytes; MA = maximum amplitude; TEG = thrombelastography; ACT = activated clotting time; CNS = central nervous system; ACh = acetylcholine; GABAergic =  $\gamma$ -aminobutyric acid-mediated; LA = local anesthetics; EAA = excitatory amino acids.

tissue trauma or presence of pathogens. Release of vasoactive mediators from tissue mast cells (histamine, leukotrienes), as well as from platelets and plasma components (bradykinin), causes vasodilation and increased vascular permeability, leading to the classic inflammatory signs of redness (*rubor*) and heat (*calor*). The resulting edema causes swelling (*tumor*), and interactions of inflammatory mediators with the sensory systems induce pain (*dolor*). Significant local inflammation causes a systemic response, termed the *acute phase reaction*. This response is manifested by increases in acute phase proteins (C-reactive protein, complement factor C3, fibrinogen, and serum albumin), followed by activation of several systems of mediators (kinin system, complement system, lipid mediators, and cytokines). Cytokines, in particular, are important for regulation of the inflammatory response. The local release of cytokines (interleukin-1 [IL-1], IL-8, tumor necrosis factor [TNF]) coordinates the inflammatory response at the site of injury and induces neutrophil chemotaxis to the site of inflammation. Some cytokines (IL-1, IL-6, TNF) released from inflammatory sites mediate the systemic response. They induce fever and the acute phase reaction, mobilize neutrophils from the bone marrow, and promote lymphocyte proliferation.

The inflammatory response induces cells (primarily PMNs and monocytes) to migrate into the affected area, in which they destroy pathogens, largely by phagocytosis. This process can be divided into several stages (fig. 1):

1. PMNs sense chemoattractants derived from bacteria, complement activation, and cytokine production at the site of infection.
2. PMNs roll onto and attach to endothelial cells (margination and adhesion). Adhesion is mediated by histamine, complement factors C5a and C3a, IL-1 and IL-8, and TNF and platelet-activating factor.
3. PMNs squeeze through gaps between adjacent endothelial cells (diapedesis).
4. PMNs migrate up the chemoattractant gradient to the pathogen (chemotaxis). C5a, C3a, IL-8, and leukotriene B<sub>4</sub> (LTB<sub>4</sub>) and other cytokines are involved in chemotaxis.
5. Pathogens are opsonized (coated with specific serum proteins, such as complement fragments, immunoglobulins, or acute phase proteins) and PMNs are primed (switched to an activated state with increased surface expression of plasma membrane receptors and enhanced nicotinamide adenine dinucleotide phosphate [NADPH]-oxidase activity).
6. PMNs generate reactive oxygen metabolites (O<sub>2</sub><sup>-</sup>, H<sub>2</sub>O<sub>2</sub>, OH, and particularly HOCl) using NADPH-oxidase or myeloperoxidase enzyme complexes. Increased oxygen uptake (independent from mitochondrial respiration) is required for generation of free radicals and is referred to as *respiratory burst*.
7. PMNs deliver free radicals to the pathogen. Pathogens are killed by phagocytosis (by PMNs and mononuclear phagocytes) and—in PMNs—by delivery of high concentrations of reactive oxygen metabolites into the phagosome.
8. This inflammatory response can be enhanced further by PMN products.

The inflammatory response is essential for structural and functional repair of injured tissue. It is, however, a double-edged sword. Excessive generation of proinflammatory signals, as occurs in several disease states, can aggravate tissue damage because of products derived from inflammatory cells. This suggests that modulation of the inflammatory response (e.g., by LAs) might prevent such tissue damage.

### Effects of LAs on Inflammatory Processes

This section describes some actions of LAs on inflammatory processes. We focus on three specific disease states relevant to anesthesiologists: inflammatory lung injury, increased microvascular permeability, and myocardial ischemia-reperfusion injury. In addition, we discuss briefly the use of LAs to treat inflammatory bowel disease, an area of active clinical investigation. Finally, we refer to an issue of considerable importance: the possibility that LAs, because of their antiinflammatory properties, might increase the risk of infection in certain settings.

High LA concentrations have been used in some studies, and, in order to judge the clinical relevance of the various reports, it is important to consider the concentrations of LAs used in clinical practice. These concentrations differ widely, depending on the method of application. In order to achieve systemic effects after intravenous administration of LAs, plasma levels in the low micromolar range are required (for lidocaine, approximately 0.5–5.0 µg/ml, corresponding to 2–20 µM);<sup>16</sup> For example, intravenous administration of lidocaine at 2–4 mg/min leads to plasma concentrations of 1–3 µg/ml (4–12 µM) after 150 min.<sup>17</sup> After 15 min a 2 mg/kg intravenous bolus of lidocaine results in peak plasma levels of 1.5–1.9 µg/ml (6–8 µM).<sup>18</sup> Similar

plasma concentrations are obtained after epidural administration<sup>19</sup> or topical application of LAs (1 mg/cm<sup>2</sup>) in partial-thickness burns<sup>20</sup>; LAs applied topically on intact skin are likely to achieve substantially lower plasma concentrations. Plasma concentrations of lidocaine above 10 µg/ml tend to produce adverse effects.<sup>21</sup> In contrast, after local application or tissue infiltration of these drugs, LA tissue concentrations are typically in the millimolar range. Similar concentrations are present around the spinal nerves after epidural or spinal administration of LAs.<sup>22</sup> LA concentrations at specific sites vary widely, depending on the method of administration. *In vivo*, LAs are largely protein-bound, lowering the concentrations available for interactions with signaling systems.

Most studies have used lidocaine as a prototypical compound. Although other LAs appear to exhibit largely similar actions, there is clearly a lack of comparative studies with LAs from various classes, and very few structure–function studies have been performed. Data obtained with lidocaine cannot necessarily be extrapolated to other LAs.

#### *Effects of LAs on Lung Injury*

Polymorphonuclear granulocytes, macrophages, and cytokines play crucial roles in the pathogenesis of inflammatory lung injury. Cytokines increase the expression of adhesion molecules, thereby increasing margination of PMN accumulated in the lung. The attachment of PMN affects endothelial cells and microvascular permeability.

Nishina *et al.*<sup>23</sup> reported that pre- or early posttreatment with lidocaine (bolus 2 mg/kg + 2 mg · kg<sup>-1</sup> · h<sup>-1</sup> continuous infusion, yielding plasma concentrations of 1.2–2.5 µg/ml [5–10 µM]) attenuates the late phase of acid installation-induced lung injury in rabbits. Lidocaine decreased PMN accumulation in the lung. Superoxide anion production by PMNs obtained from the pulmonary artery was inhibited, indicating reduced free radical generation. In turn, this would reduce endothelial damage and therefore might decrease pulmonary edema. The HCl-induced increase in pulmonary wet:dry ratio and albumin extravasation was attenuated in lidocaine-treated rabbits, and cytokine levels in bronchoalveolar fluid decreased. (Fluid used for bronchoalveolar lavage routinely contains high concentrations of LA in clinical<sup>24</sup> and animal experiments.<sup>25</sup> These concentrations of LA have been shown to affect the behavior of alveolar macrophages significantly.<sup>26</sup>) The decrease in cytokines was more likely a result from attenuation of the inflammatory response, rather than direct suppres-

sion of cytokine production by macrophages or alveolar epi- and endothelium. Plasma levels of IL-6 and IL-8, and IL-6 concentrations in bronchoalveolar fluid, were less in lidocaine-treated animals. The antiinflammatory effects of lidocaine improved lung function after tracheal HCl installation, indicated by improved partial pressure of oxygen and attenuation of both decreased compliance and increased resistance. The protective effects observed were likely a result of inhibition of sequestration and activation of PMNs.<sup>23</sup>

Interactions of PMNs with endothelial cells also may be important in the pathogenesis of organ dysfunction induced by endotoxin. Increased margination of activated PMN in response to an inflammatory stimulus contributes to endothelial damage. Because LAs interfere with the initial steps of inflammation *in vitro*, a protective effect of these drugs in endotoxin-induced lung injury might be expected. Schmidt *et al.*<sup>27</sup> reported that, in a rat model of sepsis, pretreatment with lidocaine (plasma concentration 1.4–2.5 µg/ml [6–10 µM]) attenuated endotoxin-induced increases in PMN adherence, PMN activation and migration to the inflammatory site, and PMN metabolic function, as assessed by an inhibition of free radical production. The protective action of lidocaine was not a result of differences in venular wall shear rate. Instead, inhibition of PMN adherence to endothelial cells, PMN function, and suppression of histamine release by lidocaine may explain the observed decrease of microvascular permeability in lidocaine-pretreated rats. Similar results were obtained by Mikawa *et al.*,<sup>28</sup> who showed that pretreatment with lidocaine (single dose of 2 mg/kg intravenously followed by continuous infusion of 2 mg · kg<sup>-1</sup> · h<sup>-1</sup>) significantly attenuates endotoxin-induced lung injury in rabbits, by attenuating the accumulation and the O<sub>2</sub><sup>-</sup> production of PMNs.

The mechanisms underlying ARDS induced by long-term exposure to high oxygen concentrations remain unclear. An inflammatory mechanism, including PMN activation and sequestration in the lung, may be pivotal in the pathogenesis of this syndrome. This hypothesis is confirmed by the fact that antioxidants protect the lung in such situations. Considering the effects of LAs on inflammatory cells, it would be expected that their anti-inflammatory properties help prevent hyperoxic lung injury. Takao *et al.*<sup>29</sup> demonstrated a protective effect of LAs on inflammatory responses and pulmonary function in a rabbit model of hyperoxia-induced lung injury. Lidocaine infusion to systemically relevant plasma concentrations (1.4–2.5 µg/ml [6–10 µM]) decreased chemotactic factors (C3a, C5a, TNF-α, IL-1β) in bronchoalveolar

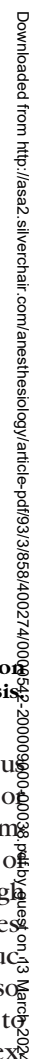

In an *in vivo* model of ligature-induced obstructive ileitis in rats, lidocaine, administered intravenously (2 mg/kg) or sprayed directly onto the serosa, suppressed the inflammatory reaction, as indicated by marked inhibition of fluid secretion and albumin extravasation.<sup>30</sup> Although blockade of neurons in the enteric nervous system (especially the myenteric plexus), with subsequent reduction in the release of secretory mediators such as vasoactive intestinal polypeptide, may have contributed to the antisecretory action of lidocaine, this does not explain easily why lidocaine pretreatment of the serosa of the obstructed jejunum reduced the inflammatory reaction in the bowel wall even 18 h later. Lidocaine's interference with several steps of the inflammation cascade may be a more likely explanation for the protective effect observed in this study.<sup>31</sup> Similar results were obtained by Rimbäck *et al.*<sup>30</sup> They studied the effects on HCl-induced peritonitis of topical pre- and posttreatment of the peritoneal surface with lidocaine (37 mM) and



bupivacaine (17.5 mM). Both anesthetics significantly inhibited Evans blue albumin extravasation, a marker of microvascular permeability. Although both drugs were titrated to the same nonionized fraction (based on  $pK_a$ ), lidocaine showed a more potent inhibitory effect.<sup>30</sup>

Using hamster cheek pouch, Martinsson *et al.*<sup>32</sup> observed reversible inhibition by ropivacaine (100  $\mu$ M) of LTB<sub>4</sub>-induced plasma exudation, indicating that the effect is not specific to lidocaine.

Thermal injury activates the complement system and other inflammatory cascades, resulting in progressive plasma extravasation with subsequent hypoproteinemia and hypovolemia. Antiinflammatory drugs inhibit burn-induced albumin extravasation,<sup>33,34</sup> suggesting a role for inflammatory mediators in the pathogenesis of edema. Therefore investigators were interested in studying whether the anti-inflammatory properties of LAs could protect microvascular integrity, without increasing infection rate. Using skin burns in rats, Cassuto *et al.*<sup>35</sup> reported that topical application or systemic administration of amide LAs, in doses resulting in plasma concentrations below toxic level,<sup>17,20</sup> significantly inhibited plasma exudation in rats compared with placebo. This protective action could be explained by several of the known effects of LAs. Inhibition of PMN delivery to the site of inflammation,<sup>36</sup> direct suppression of PMN-endothelial adhesiveness,<sup>37</sup> reduced generation of toxic oxygen metabolites,<sup>38,39</sup> impaired prostaglandin and leukotriene production<sup>33,40</sup> or increased local prostacyclin production,<sup>41</sup> and reduced PMN stickiness and adherence to injured endothelium all may contribute to the reduced plasma extravasation. These findings were not confirmed, however, by Nishina *et al.*,<sup>25</sup> who did not find that LAs affect leukotrienes and prostacyclin. Inhibition of sensory neurons with resultant decreases in release of substance P, suggested to be important for edema development after thermal injury,<sup>42</sup> is another possible explanation. Cassuto *et al.*<sup>35</sup> reported that the protective effect was lost if the systemically administered concentration of lidocaine was increased from 10 to 30  $\mu$ g  $\cdot$  kg<sup>-1</sup>  $\cdot$  min<sup>-1</sup>. A potential explanation for this unusual concentration-dependency is activation or block of additional pathways at the higher lidocaine concentration. A similar and possibly related phenomenon is the concentration-dependent action of LAs on vascular smooth muscle *in vitro* and *in vivo*.<sup>43</sup> Low concentrations (for lidocaine 1  $\mu$ g/ml–1 mg/ml, corresponding to 4  $\mu$ M–4 mM) induce vasoconstriction; greater concentrations induce vasodilation. It is conceivable that vasocon-

striction would decrease edema formation, and vasodilation would enhance it.

Inhibiting the inflammatory response could increase the incidence of infection, but Brofeldt *et al.*<sup>20</sup> reported that 5% lidocaine cream, applied to the skin of patients with partial-thickness burns in concentrations up to 2.25 mg/cm<sup>2</sup>, was associated with good pain relief, plasma concentrations below toxic levels, no infections or allergic complications, and excellent wound healing. These studies suggest that benefit may be obtained from topical treatment with LAs, even in patients with extensive burns.

### *Effects of LAs on Inflammatory Diseases of the Gastrointestinal Tract*

Inflammatory processes contribute to the development of several bowel diseases. Ulcerative colitis and proctitis are caused by both immunologic and inflammatory stimuli. In a rat colitis model, ropivacaine showed protective effects,<sup>32,44</sup> and clinical studies have shown that LAs can be effective against the severe mucosal inflammation of these diseases.<sup>45,46</sup> Arlander *et al.*<sup>47</sup> reported that patients with ulcerative colitis treated rectally with ropivacaine 200 mg twice daily (mean peak plasma concentrations 1.0–1.4  $\mu$ g/ml [3.6–5.0  $\mu$ M]) demonstrated decreased inflammation and reduced clinical symptoms after only 2 weeks of treatment. Perturbation of the link between inflammatory and immunocompetent cells, as well as blockade of hyperreactive autonomic nerves (which also may play a causative role in these diseases),<sup>48</sup> were suggested as possible explanations for the LA effect. Decreased release of proinflammatory lipoxygenase products (LTB<sub>4</sub> or 5-hydroxy-eicosatetraenoic acid), with other potentially cytoprotective eicosanoids (15-hydroxy-eicosatetraenoic acid and prostacyclin) unaffected, also may contribute to this beneficial effect of ropivacaine.<sup>49</sup> Lidocaine failed, however, to inhibit prostanoid release by human gastric mucosa *in vitro* at concentrations less than 250  $\mu$ g/ml.<sup>50</sup>

Lidocaine (plasma concentration 5–15  $\mu$ M) accelerated the return of bowel function in patients undergoing radical prostatectomy,<sup>51</sup> resulting in a significant shortening of hospital stay. LAs (lidocaine 100 mg bolus intravenously + 3 mg/min continuous intravenous infusion, or bupivacaine 2 mg/kg intraabdominal installation) also shortened the duration of postoperative ileus in patients undergoing major abdominal surgery.<sup>52,53</sup> Peritoneal surgery is associated with release of inflammatory mediators such as histamine, prostaglandins, and kinins.<sup>52,54</sup> Activation of abdominal reflexes resulting in

longlasting inhibition of colonic motility after surgery is likely to be a result of inflammatory reactions in the area undergoing surgery. Because LAs affect the release of inflammatory agents, beneficial effects on bowel function may result at least in part from lidocaine's antiinflammatory effects. This hypothesis is supported by the observation that nonsteroidal antiinflammatory drugs are also effective.<sup>55</sup> The antiinflammatory effect of LAs is prolonged and persists after serum levels have decreased.<sup>45,56</sup> This might explain lidocaine's effect on bowel function 36 h after infusion was discontinued.<sup>52</sup>

Taken together, these findings show significant promise for the use of LAs in the treatment of inflammatory bowel disease, as well as in the attenuation of postoperative ileus.

#### *Effects of LAs on Myocardial Infarction and Reperfusion Injury*

Acute myocardial infarction is not usually considered an inflammatory disease, but infarction, and particularly ischemia-reperfusion injury, is accompanied by a significant cardiac inflammatory response. PMN-endothelial interactions occurring during myocardial ischemia and reperfusion are thought to play a crucial role, and PMN-derived oxygen metabolites are important in myocardial injury associated with reperfusion of the ischemic heart.<sup>57</sup> Activated PMN can induce structural changes in the heart through the action of free radicals and arachidonic acid metabolites.<sup>58</sup> In 1984 Mullane *et al.*<sup>59</sup> reported that drugs that impair PMN function may reduce infarct size. Recent studies have shown that IL-6 and IL-8 are important regulators of the inflammatory response in myocardial infarction,<sup>60</sup> and C5a is suggested as a key mediator of tissue injury in this setting.<sup>61</sup> Moreover, expression of PMN and monocyte adhesion molecules and their ligands increases in the acute phase of myocardial infarction.<sup>62</sup> It is not surprising that blockade of adhesion molecules, reducing PMN accumulation in the myocardium, exerts significant protective effects on myocardial ischemia-reperfusion injury in rats.<sup>63</sup> Intravenous administration of antibodies against CD11b-CD18 reduced myocardial reperfusion injury in an animal model.<sup>64</sup> Similar findings were observed after treatment with 17 $\beta$ -estradiol, which decreased TNF- $\alpha$  levels and reduced intercellular adhesion molecule-1-mediated binding of PMN to injured myocardium, leading to less PMN accumulation and subsequent protection against reperfusion injury.<sup>65</sup> Leukotriene synthesis inhibitors also provide significant cardioprotection in myocardial ischemia.<sup>66</sup> PMN-mediated endothelial reperfusion

injury can be attenuated by PMN depletion during reperfusion.<sup>67</sup>

Experiments in a porcine model of myocardial ischemia have shown that lidocaine, either administered intravenously or perfused in a retrograde manner before onset of reperfusion, preserved the ischemic myocardium and reduced infarct size after reperfusion.<sup>68</sup> Lidocaine infusions in dogs reduced infarct size, possibly by inhibiting release of toxic oxygen metabolites.<sup>69</sup> In contrast, de Lorgeril *et al.*<sup>70</sup> reported that, in their dog model, lidocaine (plasma concentration 13  $\mu$ M) reduced neither infarct size nor myocardial PMN accumulation significantly. These discrepancies might be caused by differences between the models, particularly the duration of occlusion.

Lidocaine is used for antiarrhythmic treatment after myocardial infarction. It is conceivable that part of the antiarrhythmic effect in this setting is a result of antiinflammatory effects of lidocaine in areas of myocardial infarction. Although lidocaine administration failed to be effective in treating reperfusion arrhythmias in several experimental studies in dogs and pigs,<sup>70,71</sup> lidocaine decreased reperfusion arrhythmias caused by free radical-induced enhanced automaticity, without effect on reentry arrhythmias.<sup>72</sup>

#### *LAs and Increased Risk of Infection*

An important aspect of the antiinflammatory properties of LAs is a possible increase in susceptibility to infections: LA-mediated depression of the PMN oxidative metabolic response may decrease the ability to control bacterial proliferation. Investigations suggest, however, that the remaining PMN function is sufficient to minimize the risk. Peck *et al.*<sup>38</sup> found that the microbicidal function of PMNs from patients receiving lidocaine infusions was only slightly decreased. Although Groudine *et al.*,<sup>51</sup> who showed that lidocaine infusion has beneficial effects on bowel function in patients undergoing radical prostatectomy, concluded that lidocaine might be useful in major abdominal surgery, caution seems warranted in employing LA infusions (intravenously or epidurally) in surgical patients with gross bacterial contamination of body cavities. In a letter responding to the report of Groudine *et al.*, Drage<sup>73</sup> referred to a study by MacGregor *et al.*,<sup>36</sup> in which five of six rats treated with lidocaine (1.5 mg/kg intravenous bolus + 0.3 mg  $\cdot$  kg<sup>-1</sup>  $\cdot$  min<sup>-1</sup>) died within 48 h from *Staphylococcus aureus* inoculation ( $3 \times 10^8$  colony-forming units intraperitoneally), but of six rats that were inoculated with *S. aureus* but not treated with lidocaine only a single animal died.

Powell *et al.*<sup>74</sup> reported increased infection risk if eutectic mixture of local anesthetics cream was applied to contaminated wounds.

It appears, therefore, that LAs are most likely to be beneficial in settings of sterile inflammation, in which the excessive inflammatory response is a major pathogenic factor. In contrast, LAs might be detrimental in settings of bacterial contamination, in which an unmitigated inflammatory response is required to eliminate the microorganisms.

Local anesthetics, in millimolar concentrations, possess antimicrobial properties *in vitro*<sup>75,76</sup> and *in vivo*.<sup>77</sup> Lidocaine (37 mM) inhibits growth of *Escherichia coli* and *Streptococcus pneumoniae* but has no effect on *S. aureus* or *Pseudomonas aeruginosa*; 2% lidocaine (74 mM) inhibits all of these bacteria.<sup>78</sup> Schmidt and Rosenkranz,<sup>79</sup> utilizing a larger number of bacterial pathogens, showed similar results, demonstrating inhibition of all pathogens except *S. aureus* and *P. aeruginosa*.

The mechanisms behind this antibacterial action are unclear.<sup>80</sup> Recent investigations suggest that the antimicrobial activity seems to be bactericidal rather than bacteriostatic.<sup>81</sup>

Recently, Sakuragi *et al.*<sup>82</sup> showed that preservative-free bupivacaine (4.4–26.0 mM) possesses temperature- and concentration-dependent bactericidal activity against microorganisms in the human skin flora. *S. aureus* was more resistant to bactericidal activity of bupivacaine than were *Staphylococcus epidermidis* or *E. coli*.

Such antibacterial actions, however, are obtained only at high concentrations. Feldman *et al.*<sup>83</sup> observed that low concentrations of bupivacaine had, at best, limited antibacterial activity and did not inhibit growth of coagulase-negative staphylococcus. They concluded that LAs are unlikely to prevent, for example, epidural catheter-related infections. Only bupivacaine concentrations of 8 mM or higher appeared to have antibacterial properties. Concentrations of LAs in the epidural environment, are in the millimolar range. Although, to our knowledge, no published studies exist, it might be possible that the antibacterial properties of epidural LAs contribute to prevention of epidural infections; if so, eliminating LAs from epidural infusions might result in a higher infection rate.

High concentrations of LAs also inhibit viruses. Using an *in vitro* test (plaque neutralization test in Vero cells) to study the antiviral action of LAs against herpes simplex virus 1, De Amici *et al.*<sup>84</sup> reported that anesthetics with intermediate potency such as mepivacaine can inhibit viral replication by up to 50%, but only with con-

centrated solutions (more than 1% [35 mM]) and if applied in combination with epinephrine. Bupivacaine (15.5 mM) also inhibited, but again, without epinephrine the effect was reduced markedly. Inhibition was maximal with 1% (approximately 31-mM) solutions. It is likely that the inhibitory effect is directed primarily against the virus itself and not (as with most antiviral drugs) mediated by interference with the mechanisms of cellular replication. LAs can exert antiviral activity in a concentration-dependent manner. This effect is influenced by other factors such as osmolality and presence of epinephrine (possibly a pH effect), especially if a less concentrated solution is employed.

Because the antibacterial and antiviral effects of LAs are observed only at high concentrations, antiinflammatory actions of these compounds at systemic levels in theory can increase the risk of infection. This has not been relevant in the *in vivo* studies reported to date, except in settings of gross bacterial contamination. One of the hallmarks of the findings described here is that these compounds can modulate excessive inflammatory responses without significant impairment of host defenses. The next section describes the cellular actions underlying this inflammatory modulation.

## Effects of LAs on Inflammatory Cells and Mediators

### Effects on Release of Inflammatory Mediators

Leukotrienes, particularly LTB<sub>4</sub>, play an important role in the early phase of inflammation.<sup>85</sup> Reduction of leukotriene release is therefore a major option for modulating inflammation.

Leukotriene B<sub>4</sub>, formed in inflammatory cells such as PMNs and monocytes, is a potent stimulator of PMN activity. It induces margination at endothelial cells, degranulation, diapedesis, and superoxide generation and acts synergistically with prostaglandin E<sub>2</sub> to enhance vascular permeability. It has a high chemotactic potency for PMNs (*i.e.*, it is a potent leukoattractant) *in vitro* and *in vivo*. Blocking release of this chemotactic mediator exerts an antiinflammatory action, because PMNs no longer are recruited to the inflammatory site. LAs block leukotriene release. *In vitro* preincubation of human PMNs or monocytes with different concentrations of lidocaine or bupivacaine (2–20 mM lidocaine and 0.4–4.4 mM bupivacaine) inhibit LTB<sub>4</sub> release nearly completely.<sup>86</sup> This may explain some of the antiinflammatory effects of the compounds. Because LTB<sub>4</sub>, in combination



with prostaglandin  $E_2$ , induces edema formation, blockade of  $LTB_4$  release by LAs may explain in part the beneficial effects of LAs on edema formation.<sup>30</sup>

Interleukin-1 $\alpha$  is another inflammatory mediator, which, acting on its receptor on PMNs, stimulates phagocytosis, respiratory burst, chemotaxis, and degranulation. Reduced release of cytokines such as IL-1 $\alpha$  therefore also would contribute to an antiinflammatory effect of LAs. *In vitro*, amide LAs, such as lidocaine and bupivacaine, dose-dependently (lidocaine 0.2–20.0 mM, bupivacaine 44–4,400  $\mu$ M) inhibit IL-1 $\alpha$  release in lipopolysaccharide-stimulated human peripheral blood mononuclear cells.<sup>86</sup>

Lidocaine also inhibits histamine release from human peripheral leukocytes, cultured human basophils, and mast cells *in vitro* at concentrations in the high micromolar range.<sup>87</sup> It therefore appears that LAs can inhibit the release of several critical inflammatory mediators; in addition to direct effects on PMNs and macrophage function, this may be one of the main pathways by which they exert their antiinflammatory effects.

#### *Effects of LAs on PMN Adhesion*

Adhesion of PMNs to endothelium, if excessive, may induce endothelial injury, which is mediated by several adhesion molecules. One of the most important for firm adhesion of PMN to endothelium and subsequent transmigration (diapedesis) is CD11b-CD18, a member of the integrin family.<sup>88</sup> This receptor is expressed constitutively on the surface of nonactivated PMN, but expression increases markedly after inflammatory stimulation. Binding of activated PMN to endothelial cells by CD11b-CD18 increases intracellular peroxide levels in the endothelial cells, in which reactive oxygen species can have detrimental effects.<sup>89</sup> Monoclonal antibodies against CD11b-CD18 protect *in vitro* against endothelial cell injury.<sup>89</sup> *In vitro* studies have shown a reduction of TNF- $\alpha$ -induced up-regulation of CD11b-CD18 surface expression on PMN after ropivacaine or lidocaine treatment. This may contribute to the beneficial *in vivo* effects of ropivacaine on ulcerative colitis,<sup>32</sup> at tissue concentrations (100–300  $\mu$ M) obtained after rectal LA administration.

Recombinant human granulocyte colony-stimulating factor (rhG-CSF) participates in PMN-endothelial interactions by stimulating PMN functions and upregulating expression on PMNs of cellular adhesion molecules, such as CD11b-CD18. Lidocaine (20 mM), added to PMNs during incubation with rhG-CSF, abolished the priming effect of rhG-CSF and inhibited rhG-CSF-stimulated surface expression of CD11b. The effect was concentration-

dependent (4–40 mM), and decreased PMN adherence *in vitro*.<sup>90</sup> Because increases in intracellular  $Ca^{2+}$  concentration play a major role in PMN activation,<sup>91</sup> and upregulation of CD11b is also  $Ca^{2+}$ -dependent,<sup>92</sup> *in vitro* inhibition by lidocaine (14 mM) of increases in intracellular  $Ca^{2+}$  concentration<sup>93</sup> may be responsible for this action.

When adhering to surfaces, PMNs flatten out the rounded cell shape characteristic for circulating cells. Conversely, rounding of PMNs prevents endothelial adhesion. Low temperature, colchicine, and cyclic adenosine monophosphate prevent PMNs from flattening and therefore from adhering to surfaces. Rounding is characterized by cell contraction, synthesis of retraction fibrils, and withdrawal of cell processes. Inhibition of phagocytosis, lysosomal enzyme release, superoxide production, and postphagocytic oxygen consumption all are associated with marked cell rounding and withdrawal of cell processes.<sup>26,94–97</sup> If PMNs are exposed to LAs *in vitro* (lidocaine 12 mM or tetracaine 1.5 mM), these morphologic changes also occur, followed by inhibition of adhesion and therefore impaired PMN delivery to sites of inflammation.<sup>98</sup> Perfusion with LA-free medium reverses these effects. Rounding also occurs after  $Na^+$  depletion of or  $Mg^{2+}$  and  $Ca^{2+}$  addition to the medium. Because tetrodotoxin does not affect rounding, the LA effect seems unrelated to  $Na^+$  channel inhibition. Rabinovitch and DeStefano<sup>94</sup> reported that macrophages cultured *in vitro* and incubated with either lidocaine (12 mM) or tetracaine (1.5 mM) underwent reversible cell rounding associated with cell contraction and withdrawal of cell processes. *In vitro*, lidocaine induces a dose-dependent reduction of granulocyte adherence; significant effects are obtained with concentrations  $\geq 100 \mu$ M. *In vivo*, bolus injection of 2.5 mg/kg lidocaine in rabbits caused a transient decrease in adherence (to 40% of control) 5 min later.<sup>36</sup> Adherence recovered 15 min after injection. Continuous lidocaine infusion ( $0.3 \text{ mg} \cdot \text{kg}^{-1} \cdot \text{min}^{-1}$ ) after bolus injection maintained this inhibitory effect for the duration of infusion. Similar results were obtained in humans receiving a 100-mg bolus of lidocaine intravenously for treatment of arrhythmia.<sup>36</sup>

Peritonitis is accompanied by a profound increase in PMN adherence and subsequent delivery into the exudate. In rabbits, lidocaine (1.5 mg/kg bolus, followed by  $0.3 \text{ mg} \cdot \text{kg}^{-1} \cdot \text{min}^{-1}$ ) markedly inhibited both adherence (to 25% of control) and delivery (to 2% of control), measured 6 h after induction of peritonitis and initiation of lidocaine infusion.<sup>36</sup> In this experiment, lidocaine treatment caused a more than 10-fold larger inhibition of inflammation than did methylprednisolone (2- to 3-kg

rabbits were given 15-mg doses of the depot form subcutaneously twice at 7-day intervals, and 1–3 days after the second dose sterile peritonitis was induced). In the hamster cheek pouch preparation, ropivacaine (100  $\mu\text{M}$ ) markedly inhibits  $\text{LTB}_4$ -induced PMN adhesion in post-capillary and larger venules. This may be caused by an effect on PMN rolling or firm adhesion.<sup>32</sup> Reduction of PMN rolling may result in part from alterations in blood flow and in part from effects on PMN-endothelial interactions.<sup>32</sup>

Local anesthetics decrease the ability of PMNs to adhere to surfaces. As a result, one would anticipate a significant effect on PMN accumulation at the site of inflammation.

#### *Effects of LAs on PMN Migration*

Migration of PMNs is a key event during the inflammatory response. Lidocaine's inhibitory effect on PMN migration has been reported by several investigators, using both *in vitro* and *in vivo* models.<sup>99–101</sup> Hammer *et al.*<sup>99</sup> showed *in vitro* that lidocaine (4–20 mM) concentration-dependently inhibits human PMN metabolism and random mobility, with complete immobilization of PMNs occurring in the presence of 20 mM. Dickstein *et al.*<sup>102</sup> reported that, *in vitro*, exposure to 1–100  $\mu\text{M}$  lidocaine inhibits macrophage migration. Destruction of the functional integrity of cytoskeletal structures,<sup>103</sup> interference with  $\text{Ca}^{2+}$ -dependent cellular processes,<sup>104</sup> and interaction with membrane lipids, causing changes in stability and fluidity of the membrane, may contribute to the observed effect of the compound.<sup>102</sup>

#### *Effects of LA on PMN Accumulation*

Wound healing requires that a large number of PMNs migrate to an injured area. Effects of local administration of LAs on wound healing processes are of special interest, because these drugs often are injected into tissue for pain relief after surgery. Studies on this topic have, however, yielded contradictory conclusions. Some *in vivo* investigations have demonstrated delayed wound healing,<sup>105</sup> no effects,<sup>106</sup> or even improved wound healing<sup>107</sup> after LA infiltration.

Eriksson *et al.*<sup>101</sup> investigated the effects of lidocaine on PMN accumulation in a wound, using an *in vivo* rat model. Inflammation was induced by implantation of a titanium chamber close to the peritoneum. Pretreatment of the wound with 10 mg lidocaine reduced the accumulation of PMN in the wound area compared with saline-treated rats. Chemiluminescence in the lidocaine

group was reduced markedly, indicating suppression of metabolic responsiveness of PMN. MacGregor *et al.*<sup>36</sup> reported that in rats PMN accumulation during peritonitis is suppressed by lidocaine (1.5 mg/kg bolus followed by infusion of  $0.3 \text{ mg} \cdot \text{kg}^{-1} \cdot \text{min}^{-1}$  for the duration of the experiment). Scott *et al.*<sup>108</sup> found that lidocaine, at micromolar concentrations, impairs accumulation and adherence of PMNs in an *in vivo* canine model. These findings may be explained by inhibition of PMN adherence (and therefore inhibition of migration),<sup>36,100,109</sup> or a direct inhibitory effect on motility and migration of PMNs.<sup>36,99,100</sup> In addition, it is conceivable that LAs inhibit chemoattractant release by impairing cell metabolism.<sup>86,96,99,101</sup>

It appears that LAs reduce the ability of PMNs to migrate to the site of inflammation by interference with the critical steps of adhesion and migration. The result is decreased PMN accumulation.

#### *Effects of LAs on PMN Priming*

The priming process can be described as a potentiated response of PMNs after previous exposure to priming agents, such as  $\text{TNF-}\alpha$ , platelet-activating factor, IL-8, lipopolysaccharide, or granulocyte-macrophage colony stimulating factor. Priming is a key regulatory mechanism of PMN function and seems to play a pivotal role in the "overstimulation" of inflammatory pathways, which then induces tissue damage rather than protect the host. As such, the process is being investigated intensively, but mechanisms are as yet poorly understood. An excellent overview of the pathophysiologic consequences and underlying mechanisms of PMN priming was published in 1998 by Condliffe *et al.*<sup>110</sup>

The effects of LAs on PMN priming have not been investigated in detail. We have shown *in vitro* that lidocaine blocks priming of PMNs by lysophosphatidic acid in a concentration-dependent manner ( $\text{IC}_{50} = 1 \mu\text{M}$ ).<sup>111</sup> In contrast to other LA actions on these signaling systems, the LAs acted at an extracellular site; the non-permeable lidocaine analog QX314 had effects similar to those of lidocaine. It is possible that inhibition of priming contributes to the antiinflammatory actions of LAs, and in particular suppresses the deleterious effects of the uncontrolled, overactive response of inflammatory cells to a stimulating agent. This might explain how LAs can decrease tissue damage without significantly inhibiting PMN functions required for host defense.

NADPH-oxidase activity,  $\text{Ca}^{2+}$ , protein kinase C, phospholipase D, and phosphatidylinositol-3-kinase are likely to be involved in the priming process. In other settings,

inhibition of NADPH-oxidase activity,  $\text{Ca}^{2+}$ , transients and protein kinase C have been described for several LAs<sup>112</sup> such that the compounds might be anticipated to affect priming.<sup>93,113,114</sup> Effects of LAs on phospholipase D and phosphatidylinositol-3-kinase to our knowledge have not been published.

Interactions of LAs with PMN priming require more investigation.

#### *Effects of LAs on PMN Free Radical and Granule Enzyme Release*

Activated PMNs generate light (chemiluminescence), which can be measured as an indicator of metabolic activity, that is, free radical generation. Although some researchers have questioned the usefulness of this methodology for investigation of PMN function, because the nature of detected oxidants is uncertain, chemiluminescence is a commonly used, sensitive, noninvasive technique to measure reactive oxidant production by PMN. *In vitro*, lidocaine and bupivacaine inhibit luminol-amplified chemiluminescence concentration-dependently ( $\text{IC}_{50} = 4\text{--}5\text{ mM}$  for lidocaine and  $1.4\text{--}2.0\text{ mM}$  for bupivacaine, depending on the manner of activation).<sup>86,38</sup> Reports of effects of lower concentrations have been contradictory: Some investigators have reported no or only a slight impairment of chemiluminescence by LAs *in vitro*,<sup>115–117</sup> but Hattori et al.<sup>5</sup> demonstrated *in vitro* suppression of PMN free radical generation by eight different LAs in a concentration-dependent manner (0.1 and 10 mM). The inhibitory effect correlated with the partition coefficient for each drug; that is, the more lipid-soluble LAs were more potent inhibitors of free radical production. Tetrodotoxin, veratridine, and amiloride hydrochloride were tested for their abilities to affect free radical generation by human PMNs. Because none of these compounds showed any inhibitory effects, the underlying mechanism of LA action is unlikely to be  $\text{Na}^+$  influx blockade.<sup>5</sup> Cederholm et al.<sup>118</sup> studied *in vitro* effects of ropivacaine, bupivacaine, lidocaine, mepivacaine, and prilocaine on both intra- and extracellular production of oxygen metabolites in human PMNs. LAs (0.5–200.0  $\mu\text{M}$ ) caused a small but statistically significant decrease in chemiluminescence response. Prilocaine's inhibitory effect on extracellular release was accompanied by an enhanced intracellular activity. This makes this drug particularly noteworthy, because excessive extracellular free radical release may cause tissue damage, and increased intracellular activity improves antimicrobial properties.<sup>118</sup> Studies on surgical wounds in rats confirmed the effects of LAs on free radical release *in*

*vivo*.<sup>101</sup> The inhibitory effect of LAs on PMN affects not only the production of  $\text{O}_2^-$  but also the generation of hydrogen peroxide and hydroxyl radical. Mikawa et al.<sup>119</sup> reported *in vitro* that LAs at concentrations of 0.1–1.2 mM decrease release of reactive oxygen species such as  $\text{O}_2^-$ ,  $\text{H}_2\text{O}_2$ , and  $\text{OH}^-$ . LAs do not scavenge the reactive oxygen species generated but rather inhibit the ability of PMNs to produce them.<sup>119</sup>

#### *Effects of LAs on PMN Lysosomal Enzyme Release*

Antimicrobial activity results in part from release of lysosomal enzymes by PMNs. Therefore Peck et al.<sup>3</sup> investigated *in vitro* the effects of 8 mM lidocaine on lysozyme and myeloperoxidase release and compared these effects with the ability of lidocaine-treated PMN to kill *E. coli*. Lidocaine significantly impaired release of both enzymes and reduced the capability of killing *E. coli* from 95 to 70%. These findings were confirmed *in vitro* for lidocaine and tetracaine.<sup>95</sup>

#### *Effects of LA on PMN Nitric Oxide Generation*

Nitric oxide plays multiple, at times contradictory roles in the inflammatory process. Because nitric oxide synthase inhibitors enhance *in vivo* the number of PMNs adherent to endothelial cells of mesenteric vessels,<sup>120</sup> increased nitric oxide production has an antiinflammatory action. Nitric oxide attenuates tissue injury during endotoxemia and sepsis *in vivo*.<sup>121</sup> In contrast, overproduction of nitric oxide by the inducible nitric oxide synthase (iNOS) expressed in macrophages or neutrophils has been implicated in the pathogenesis of septic shock or tissue injury against the host itself leading to multiple organ failure. Suppression of nitric oxide overproduction by iNOS inhibitors occasionally acts advantageously. The iNOS inhibitor aminoguanidine successfully attenuates endotoxin-induced acute lung injury *in vivo*.<sup>122</sup> *In vivo* blockade of TNF (by TNF-binding protein) and nitric oxide (by aminoguanidine) decreased PMN chemotaxis and sequestration and attenuates acute lung inflammation induced by ischemia and reperfusion of lower extremity.<sup>123</sup>

The effects of LAs on nitric oxide metabolism has not been described in detail. *In vitro*, LAs enhance *N*-formyl-methionyl-leucyl-phenylalanine- or phorbol myristate acetate-induced nitric oxide generation in human PMNs.<sup>124</sup> This may contribute to the protective effects of LAs, although it seems unlikely to be a major pathway.



### Effects of LAs on Macrophages

Macrophages are pivotal in the inflammatory response. As the primary defense against injurious agents, they generate significant amounts of cytokines and other inflammatory mediators. In an *in vitro* study of human alveolar macrophages, tetracaine and lidocaine were reversible, dose-dependent inhibitors of oxidative metabolism (oxygen consumption and free radical release). This inhibition was associated with cell rounding and occurred at LA concentrations as present in effluents recovered during bronchopulmonary lavage (2–16 mM).<sup>26</sup> Ogata *et al.*<sup>125</sup> reported *in vitro* that LAs (10 mM) reversibly inhibited phagocytosis by macrophages, in a concentration- and pH-dependent manner. Tetracaine exerted the largest and procaine the smallest effect. Phagocytosis by monocytes *in vitro* also is inhibited by lidocaine.<sup>126</sup> Lidocaine, in concentrations (500  $\mu$ M) routinely injected into tissue, inhibits phagocytosis and metabolism of human PMNs *in vitro*.<sup>96</sup>

Macrophage functions such as cytokine release, respiratory burst and phagocytosis are sensitive to intracellular pH changes, regulated by vacuola-type H<sup>+</sup>-translocating adenosine triphosphatase and the Na<sup>+</sup>-H<sup>+</sup> exchanger (NHE). LAs bind to NHE,<sup>127</sup> and lidocaine inhibits NHE in human PMNs *in vitro*.<sup>93</sup> Lidocaine also dose-dependently slowed intracellular pH recovery and suppressed phorbol myristate acetate-induced respiratory burst in rabbit alveolar macrophages *in vitro*, without decreasing metabolic activity or viability of the macrophages. Inhibition of the intracellular pH regulatory mechanism may contribute to effects of LAs on alveolar macrophage function. These findings support the hypothesis that the effect of lidocaine on phagocytosis and other macrophage processes might result in part from to an inhibitory effect on NHE.<sup>128</sup>

### Mechanisms of Action

A variety of actions of LAs on inflammatory cells have been described, many of which suggest that LAs might modulate the inflammatory response in various disease states. Most *in vitro* studies require concentrations of LAs above the clinically relevant range; *in vivo* studies of the same or similar phenomena often demonstrate effects at clinically feasible concentrations. The reasons for this discrepancy are unknown. The issue is particularly remarkable because one would anticipate that larger free LA concentrations would be available in many protein-free *in vitro* solutions, as compared with *in vivo* situations. It may be that the multiple molecular targets of LAs

allow potentiating interactions *in vivo* that cannot be attained in a simplified *in vitro* model. Alternatively, the more prolonged exposure to LAs during *in vivo* investigations may play a role. We found that, in *Xenopus* oocytes, sensitivity of thromboxane A<sub>2</sub> and lysophosphatidic acid signaling to lidocaine and bupivacaine increased more than five-fold if incubation times were extended from 10 min to 12 h.<sup>129</sup> Unfortunately, virtually nothing is known about the specific molecular mechanisms involved in these effects. In many instances Na<sup>+</sup> channel blockade can be ruled out, either because *in vitro* Na<sup>+</sup> channels are not detectable in the cell under study<sup>4</sup> or because *in vivo* LAs induce effects at concentrations much lower than those required for Na<sup>+</sup> channel blockade. Several mechanisms have been suggested (fig. 2), but only a few targets have been described in molecular detail. LA interactions with G protein-coupled receptors are an area of active investigation, because most mediators involved in the inflammatory process signal through receptors of this class. We have shown that LAs inhibit signaling of several G protein-coupled receptors mediating inflammatory responses (lysophosphatidic acid<sup>130,131</sup> and thromboxane A<sub>2</sub>),<sup>132</sup> as well as m1 muscarinic acetylcholine receptors. Functional findings using lysophosphatidic acid and platelet-activating factor in *Xenopus* oocytes were confirmed in human neutrophils.<sup>111</sup> One common target on several G protein-coupled signaling pathways is the coupled G<sub>q</sub> protein. Selective knockdown of G<sub>q</sub> eliminates LA sensitivity of lysophosphatidic acid signaling; knockdown of G<sub>o</sub> is without effect.<sup>133</sup> We have shown that the signaling pathway downstream of the G protein is not involved in the LA effect.<sup>130,131</sup> Inhibitory effects of the compound on NHE are described elsewhere here. Interactions of LAs with PKC signaling have been described,<sup>93</sup> but very little specific information is available. This area clearly deserves further research.

### Conclusions

Clear evidence exists, *in vitro* as well as *in vivo*, for antiinflammatory properties of LAs. Effects on PMN mediator and free radical release, as well as migration to the site of action, appear most important. The molecular mechanisms underlying these effects are poorly delineated. Of particular relevance is the difference in concentrations required to achieve effects on inflammatory cells *in vitro* versus much lower *in vivo* concentrations. Clinical use of LAs for the explicit purpose of modulat-



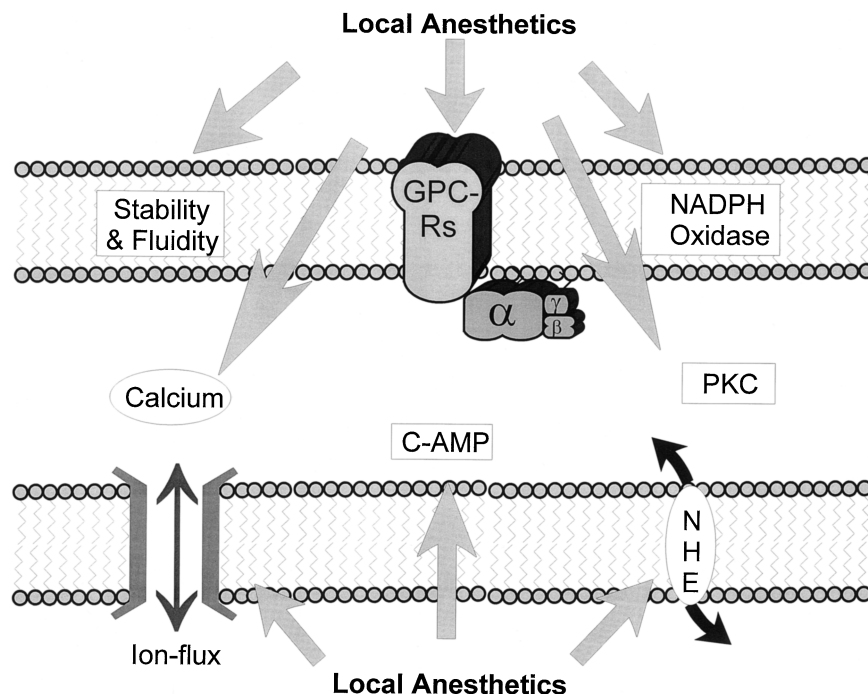

Fig. 2. Schematic overview of several suggested mechanisms of local anesthetic action on inflammatory cells. cAMP = cyclic adenosine monophosphate; GPC-Rs = G protein-coupled receptors; NADPH = nicotinamide adenine dinucleotide phosphate; NHE = Na<sup>+</sup>-H<sup>+</sup> exchanger; PKC = protein kinase C.

ing the excessive inflammatory response may be feasible. Treatment of ulcerative colitis with topical ropivacaine is one example. It seems possible that some of the beneficial effects of epidural administration of LAs (which leads to blood levels close to those attained after intravenous infusion) may be caused by antiinflammatory effects of circulating LAs. Effects on prolonged pain and hypercoagulation are examples. In those patients not able or willing to receive intra- or postoperative epidural analgesia, intravenous infusion of LAs could be considered in order to modulate postoperative inflammatory responses. In the setting of bacterial contamination, however, there is an increased risk of infection.

Further research should be directed primarily in two areas. First, we need to gain a detailed understanding of the mechanisms of action of LAs on the inflammatory system. Structure-function studies are particularly essential, because they can lead to the development of novel compounds. Second, more well-designed clinical studies should be performed, to assess whether the effects of LAs observed in cells and in animals also can be applied to clinical practice.

The authors thank Prof. Dr. med. E. Martin, Ruprecht-Karls-Universität Heidelberg, Germany, for his support and C. DiFazio, M.D., Ph.D., Professor of Anesthesiology, Department of Anesthesiology, University of Virginia Health Sciences Center, Charlottesville, Virginia, for critically reviewing the manuscript.

## References

- Scholz A, Kuboyama N, Hempelmann G, Vogel W: Complete blockade of TTX-resistant Na<sup>+</sup> currents by lidocaine and bupivacaine reduce firing frequency in DRG neurons. *J Neurophysiol* 1998; 79:1746-54
- Hollmann MW, Fischer LG, Byford AM, Durieux ME: Local anesthetic inhibition of m1 muscarinic acetylcholine signaling. *ANESTHESIOLOGY* 2000; 93:497-509
- Butterworth JF, Strichartz GR: Molecular mechanisms of local anesthesia: A review. *ANESTHESIOLOGY* 1990; 72:711-34
- Krause KH, Demareux N, Jaconi M, Lew DP: Ion channels and receptor-mediated Ca<sup>2+</sup> influx in neutrophil granulocytes. *Blood Cells* 1993; 19:165-73
- Hattori M, Dohi S, Nozaki M, Niwa M, Shimonaka H: The inhibitory effects of local anesthetics on superoxide generation of neutrophils correlate with their partition coefficients. *Anesth Analg* 1997; 84:405-12
- Balfour JA, Buckley MM: Etodolac: A reappraisal of its pharmacology and therapeutic use in rheumatic diseases and pain states. *Drugs* 1991; 42:274-99
- Fetrow KO: The management of pain in orthopaedics. *Clin J Pain* 1989; 5(suppl 2):26-32
- Jackson DL, Moore PA, Hargreaves KM: Preoperative nonsteroidal anti-inflammatory medication for the prevention of postoperative dental pain. *J Am Dent Assoc* 1989; 119:641-7
- Shanley TP, Warner RL, Ward PA: The role of cytokines and adhesion molecules in the development of inflammatory injury. *Molecular Medicine Today* 1995; 1:40-5
- Downey GP, Fukushima T, Fialkow L, Waddell TK: Intracellular signaling in neutrophil priming and activation. *Semin Cell Biol* 1995; 6:345-56

## LOCAL ANESTHETICS AND THE INFLAMMATORY RESPONSE

11. Demling RH: The modern version of adult respiratory distress syndrome. *Annu Rev Med* 1995; 46:193-202
12. Moore FA, Moore EE, Read RA: Postinjury multiple organ failure: role of extrathoracic injury and sepsis in adult respiratory distress syndrome. *New Horiz* 1993; 1:538-49
13. Goris RJ: Mediators of multiple organ failure. *Intensive Care Med* 1990; 16(suppl 3):S192-6
14. Strieter RM, Lynch JP, Basha MA, Standiford TJ, Kasahara K, Kunkel SL: Host responses in mediating sepsis and adult respiratory distress syndrome. *Semin Respir Infect* 1990; 5:233-47
15. Goris RJ: Multiple organ failure: Whole body inflammation? *Schweiz Med Wochenschr* 1989; 119:347-53
16. Collinsworth KA, Kalman SM, Harrison DC: The clinical pharmacology of lidocaine as an antiarrhythmic drug. *Circulation* 1974; 50:1217-30
17. Wiklund L: Human hepatic blood flow and its relation to systemic circulation during intravenous infusion of lidocaine. *Acta Anaesthesiol Scand* 1977; 21:148-60
18. Tsai PS, Buerkle H, Huang LT, Lee TC, Yang LC, Lee JH: Lidocaine concentrations in plasma and cerebrospinal fluid after systemic bolus administration in humans. *Anesth Analg* 1998; 87:601-4
19. Mayumi T, Dohi S, Takahashi T: Plasma concentrations of lidocaine associated with cervical, thoracic, and lumbar epidural anesthesia. *Anesth Analg* 1983; 62:578-80
20. Brofeldt BT, Cornwell P, Doherty D, Batra K, Gunther RA: Topical lidocaine in the treatment of partial-thickness burns. *J Burn Care Rehabil* 1989; 10:63-8
21. Fink BR: Acute and chronic toxicity of local anaesthetics. *Can Anaesth Soc J* 1973; 20:5-16
22. Holst D, Mollmann M, Scheuch E, Meissner K, Wendt M: Intrathecal local anesthetic distribution with the new spinocath catheter. *Reg Anesth Pain Med* 1998; 23:463-8
23. Nishina K, Mikawa K, Takao Y, Shiga M, Naekawa N, Obara H: Intravenous lidocaine attenuates acute lung injury induced by hydrochloric acid aspiration in rabbits. *ANESTHESIOLOGY* 1998; 88:1300-9
24. Strange C, Barbarash RA, Heffner JE: Lidocaine concentrations in bronchoscopic specimens. *Chest* 1988; 93:547-9
25. Kotani N, Takahashi S, Sessler DI, Hashiba E, Kubota T, Hashimoto H, Matsuki A: Volatile anesthetics augment expression of proinflammatory cytokines in rat alveolar macrophages during mechanical ventilation. *ANESTHESIOLOGY* 1999; 91:187-97
26. Hoidal JR, White JG, Repine JE: Influence of cationic local anesthetics on the metabolism and ultrastructure of human alveolar macrophages. *J Lab Clin Med* 1979; 93:857-66
27. Schmidt W, Schmidt H, Bauer H, Gebhard MM, Martin E: Influence of lidocaine on endotoxin-induced leukocyte-endothelial cell adhesion and macromolecular leakage in vivo. *ANESTHESIOLOGY* 1997; 87:617-24
28. Mikawa K, Maekawa N, Nishina K, Takao Y, Yaku H, Obara H: Effect of lidocaine pretreatment on endotoxin-induced lung injury in rabbits. *ANESTHESIOLOGY* 1994; 81:689-99
29. Takao Y, Mikawa K, Nishina K, Maekawa N, Obara H: Lidocaine attenuates hyperoxic lung injury in rabbits. *Acta Anaesthesiol Scand* 1996; 40:318-25
30. Rimbäck G, Cassuto J, Wallin G, Westlander G: Inhibition of peritonitis by amide local anesthetics. *ANESTHESIOLOGY* 1988; 69:881-6
31. Nellgard P, Jonsson A, Bojo L, Tarnow P, Cassuto J: Small-bowel obstruction and the effects of lidocaine, atropine and hexamethonium on inflammation and fluid losses. *Acta Anaesthesiol Scand* 1996; 40:287-92
32. Martinsson T, Oda T, Fernvik E, Roempke K, Dalsgaard CJ, Svensjo E: Ropivacaine inhibits leukocyte rolling, adhesion and CD11b/CD18 expression. *J Pharmacol Exp Ther* 1997; 283:59-65
33. Alexander F, Mathieson M, Teoh KH, Huval WV, Lelcuk S, Valeri CR, Shepro D, Hechtman HB: Arachidonic acid metabolites mediate early burn edema. *J Trauma* 1984; 24:709-12
34. Robson MC, Del BE, Heggors JP: The effect of prostaglandins on the dermal microcirculation after burning, and the inhibition of the effect by specific pharmacological agents. *Plast Reconstr Surg* 1979; 63:781-7
35. Cassuto J, Nellgard P, Stage L, Jonsson A: Amide local anesthetic reduce albumin extravasation in burn injuries. *ANESTHESIOLOGY* 1990; 72:302-7
36. MacGregor RR, Thorner RE, Wright DM: Lidocaine inhibits granulocyte adherence and prevents granulocyte delivery to inflammatory sites. *Blood* 1980; 56:203-9
37. Stewart GJ, Ritchie WG, Lynch PR: Venous endothelial damage produced by massive sticking and emigration of leukocytes. *Am J Pathol* 1974; 74:507-32
38. Peck SL, Johnston RB Jr, Horwitz LD: Reduced neutrophil superoxide anion release after prolonged infusions of lidocaine. *J Pharmacol Exp Ther* 1985; 235:418-22
39. Nakagawara M, Hirokata Y, Yoshitake J: Effects of anesthetics on the superoxide releasing activity of human polymorphonuclear leukocytes. *Masui* 1985; 34:754-9
40. Demling RH: Wound inflammatory mediators and multisystemic organ failure. *Prog Clin Biol Res* 1987; 236A:525-37
41. Casey LC, Armstrong MC, Fletcher JR, Ramwell PW: Lidocaine increases prostacyclin in the rat. *Prostaglandins* 1980; 19:977-84
42. Gamse R, Holzer P, Lembeck F: Decrease of substance P in primary afferent neurones and impairment of neurogenic plasma extravasation by capsaicin. *Br J Pharmacol* 1980; 68:207-13
43. Johns RA, DiFazio CA, Longnecker DE: Lidocaine constricts or dilates rat arterioles in a dose-dependent manner. *ANESTHESIOLOGY* 1985; 62:141-4
44. Martinsson T: Ropivacaine inhibits serum-induced proliferation of colon adenocarcinoma cells in vitro. *J Pharmacol Exp Ther* 1999; 288:660-4
45. Asklin B, Cassuto J: Intravesical lidocaine in severe interstitial cystitis. Case report. *Scand J Urol Nephrol* 1989; 23:311-2
46. Bjorck S, Dahlstrom A, Ahlman H: Topical treatment of ulcerative proctitis with lidocaine. *Scand J Gastroenterol* 1989; 24:1061-7
47. Arlander E, Ost A, Stahlberg D, Lofberg R: Ropivacaine gel in active distal ulcerative colitis and proctitis: A pharmacokinetic and exploratory clinical study. *Aliment Pharmacol Ther* 1996; 10:73-81
48. Bjorck S, Dahlstrom A, Johansson L, Ahlman H: Treatment of the mucosa with local anaesthetics in ulcerative colitis. *Agents Actions* 1992; special number:C60-72
49. Martinsson T, Haegerstrand A, Dalsgaard CJ: Effects of ropivacaine on eicosanoid release from human granulocytes and endothelial cells in vitro. *Inflamm Res* 1997; 46:398-403
50. Goel RK, Tavares IA, Nellgard P, Jonsson A, Cassuto J, Bennett A: Effect of lignocaine on eicosanoid synthesis by pieces of human gastric mucosa. *J Pharm Pharmacol* 1994; 46:319-20
51. Groudine SB, Fisher HAG, Kaufman RP, Patel MJ, Wilkins LJ, Mehta SA, Lumb PD: Intravenous lidocaine speeds the return of bowel function, decreases postoperative pain, and shortens hospital stay in

patients undergoing radical retropubic prostatectomy. *Anesth Analg* 1998; 86:235-9

52. Rimback G, Cassuto J, Tolleson PO: Treatment of postoperative paralytic ileus by intravenous lidocaine infusion. *Anesth Analg* 1990; 70:414-9

53. Rimback G, Cassuto J, Faxen A, Hogstrom S, Wallin G, Tolleson PO: Effect of intra-abdominal bupivacaine instillation on postoperative colonic motility. *Gut* 1986; 27:170-5

54. Di Rosa M, Giroud JP, Willoughby DA: Studies on the mediators of the acute inflammatory response induced in rats in different sites by carrageenan and turpentine. *J Pathol* 1971; 104:15-29

55. Cheng G, Cassissi C, Drexler PG, Vogel SB, Sninsky CA, Hocking MP: Salsalate, morphine, and postoperative ileus. *Am J Surg* 1996; 171:85-8

56. Dickstein R, Kiremidjian-Schumacher L, Stotzky G: Effect of lidocaine on the function of immunocompetent cells: II. Chronic in vivo exposure and its effects on mouse lymphocyte activation and expression of immunity. *Immunopharmacology* 1985; 9:127-39

57. Simpson PJ, Lucchesi BR: Free radicals and myocardial ischemia and reperfusion injury. *J Lab Clin Med* 1987; 110:13-30

58. Semb AG, Ytrehus K, Vaage J, Myklebust R: Cardiac injury by activated leukocytes: Effect of cyclooxygenase and lipoxygenase inhibition evaluated by electron microscopical morphometry. *J Mol Cell Cardiol* 1996; 28:311-20

59. Mullane KM, Read N, Salmon JA, Moncada S: Role of leukocytes in acute myocardial infarction in anesthetized dogs: Relationship to myocardial salvage by anti-inflammatory drugs. *J Pharmacol Exp Ther* 1984; 228:510-22

60. Neumann FJ, Ott I, Marx N, Luther T, Kenngott S, Gawaz M, Kotzsch M, Schomig A: Effect of human recombinant interleukin-6 and interleukin-8 on monocyte procoagulant activity. *Arterioscler Thromb Vasc Biol* 1997; 17:3399-405

61. Vakeva AP, Agah A, Rollins SA, Matis LA, Li L, Stahl GL: Myocardial infarction and apoptosis after myocardial ischemia and reperfusion: role of the terminal complement components and inhibition by anti-C5 therapy. *Circulation* 1998; 97:2259-67

62. Meisel SR, Shapiro H, Radnay J, Neuman Y, Khaskia AR, Gruener N, Pauzner H, David D: Increased expression of neutrophil and monocyte adhesion molecules LFA-1 and Mac-1 and their ligand ICAM-1 and VLA-4 throughout the acute phase of myocardial infarction: possible implications for leukocyte aggregation and microvascular plugging. *J Am Coll Cardiol* 1998; 31:120-5

63. Gumina RJ, el Schultz J, Yao Z, Kenny D, Warltier DC, Newman PJ, Gross GJ: Antibody to platelet/endothelial cell adhesion molecule-1 reduces myocardial infarct size in a rat model of ischemia-reperfusion injury. *Circulation* 1996; 94:3327-33

64. Simpson PJ, Todd RF, Fantone JC, Mickelson JK, Griffin JD, Lucchesi BR: Reduction of experimental canine myocardial reperfusion injury by a monoclonal antibody (anti-Mo1, anti-CD11b) that inhibits leukocyte adhesion. *J Clin Invest* 1988; 81:624-9

65. Squadrito F, Altavilla D, Squadrito G, Campo GM, Arlotta M, Arcoraci V, Minutoli L, Serrano M, Saitta A, Caputi AP: 17Beta-oestradiol reduces cardiac leukocyte accumulation in myocardial ischaemia reperfusion injury in rat. *Eur J Pharmacol* 1997; 335:185-92

66. Rossoni G, Sala A, Berti F, Testa T, Buccellati C, Molta C, Muller-Peddinghaus R, Maclouf J, Folco GC: Myocardial protection by the leukotriene synthesis inhibitor BAY X1005: importance of trans-cellular biosynthesis of cysteinyl-leukotrienes. *J Pharmacol Exp Ther* 1996; 276:335-41

67. Schmidt FEJ, MacDonald MJ, Murphy CO, Brown WM, Gott JP, Guyton RA: Leukocyte depletion of blood cardioplegia attenuates reperfusion injury. *Ann Thorac Surg* 1996; 62:1691-6

68. Lee R, Nitta T, Schmid RA, Schuessler RB, Harris KM, Gay WJ: Retrograde infusion of lidocaine or L-arginine before reperfusion reduces myocardial infarct size. *Ann Thorac Surg* 1998; 65:1353-9

69. Lesnefsky EJ, VanBenthuyzen KM, McMurtry IF, Shikes RH, Johnston RB, Horwitz LD: Lidocaine reduces canine infarct size and decreases release of a lipid peroxidation product. *J Cardiovasc Pharmacol* 1989; 13:895-901

70. de Lorgeril M, Rousseau G, Basmadjian A, Latour JG: Lignocaine in experimental myocardial infarction: failure to prevent neutrophil accumulation and ventricular fibrillation and to reduce infarct size. *Cardiovasc Res* 1988; 22:439-46

71. Bergey JL, Nocella K, McCallum JD: Acute coronary artery occlusion-reperfusion-induced arrhythmias in rats, dogs and pigs: antiarrhythmic evaluation of quinidine, procainamide and lidocaine. *Eur J Pharmacol* 1982; 81:205-16

72. Kabell G, Scherlag BJ, Hope RR, Lazzara R: Differential effect of lidocaine on re-entry and enhanced automaticity. *Am J Cardiol* 1980; 45:S474

73. Drage M: Caution in the use of lidocaine infusion in the surgical patient. *Anesth Analg* 1998; 87:1213

74. Powell DM, Rodehaever GT, Foresman PA, Hankins CL, Bellia KT, Zimmer CA, Becker DG, Edlich RF: Damage to tissue defenses by EMLA cream. *J Emerg Med* 1991; 9:205-9

75. Ravin CE, Latimer JM, Matsen JM: In vitro effects of lidocaine on anaerobic respiratory pathogens and strains of *Hemophilus influenzae*. *Chest* 1977; 72:439-41

76. Rosenberg PH, Renkonen OV: Antimicrobial activity of bupivacaine and morphine. *ANESTHESIOLOGY* 1985; 62:178-9

77. Conte BA, Laforet EG: The role of the topical anesthetic solutions on bronchial secretions during bronchoscopy. *N Engl J Med* 1962; 267:957-9

78. Weinstein MP, Maderazo E, Tilton R, Maggini G, Quintiliani R: Further observations on the antimicrobial effects of local anesthetic agents. *Curr Ther Res Clin Exp* 1975; 17:369-74

79. Schmidt RM, Rosenkranz HS: Antimicrobial activity of local anesthetics: lidocaine and procaine. *J Infect Dis* 1970; 121:597-607

80. Fazly Bazaz BS, Salt WG: Local anaesthetics as antibacterial agents: effects on cellular respiration and the leakage of cytoplasmic constituents. *Microbios* 1983; 37:139-49

81. Sakuragi T, Ishino H, Dan K: Bactericidal activity of clinically used local anesthetics on *Staphylococcus aureus*. *Reg Anesth* 1996; 21:239-42

82. Sakuragi T, Ishino H, Dan K: Bactericidal activity of preservative free bupivacaine on microorganisms in the human skin flora. *Acta Anaesthesiol Scand* 1998; 42:1096-9

83. Feldman JM, Chapin-Robertson K, Turner J: Do agents used for epidural analgesia have antimicrobial properties? *Reg Anesth* 1994; 19:43-7

84. De Amici D, Ramaoli F, Ceriana P, Percivalle E: Antiviral activity of local anaesthetic agents. *J Antimicrob Chemother* 1996; 37:635

85. Samuelsson B, Dahlen SE, Lindgren JA, Rouzer CA, Serhan CN: Leukotrienes and lipoxins: Structures, biosynthesis, and biological effects. *Science* 1987; 237:1171-6

86. Sinclair R, Eriksson AS, Gretzer C, Cassuto J, Thomsen P: Inhibitory effects of amide local anaesthetics on stimulus-induced human



## LOCAL ANESTHETICS AND THE INFLAMMATORY RESPONSE

leukocyte metabolic activation, LTB<sub>4</sub> release and IL-1 secretion in vitro. *Acta Anaesthesiol Scand* 1993; 37:159-65

87. Yanagi H, Sankawa H, Saito H, Ikura Y: Effect of lidocaine on histamine release and Ca<sup>2+</sup> mobilization from mast cells and basophils. *Acta Anaesthesiol Scand* 1996; 40:1138-44

88. Arfors KE, Lundberg C, Lindbom L, Lundberg K, Beatty PG, Harlan JM: A monoclonal antibody to the membrane glycoprotein complex CD18 inhibits polymorphonuclear leukocyte accumulation and plasma leakage in vivo. *Blood* 1987; 69:338-40

89. Fujita H, Morita I, Murota S: A possible mechanism for vascular endothelial cell injury elicited by activated leukocytes: A significant involvement of adhesion molecules, CD11/CD18, and ICAM-1. *Arch Biochem Biophys* 1994; 309:62-9

90. Ohsaka A, Sajonji K, Sato N, Igari J: Local anesthetic lidocaine inhibits the effect of granulocyte colony-stimulating factor on human neutrophil functions. *Exp Hematol* 1994; 22:460-6

91. Ohsaka A, Saito M, Suzuki I, Miura Y, Takaku F, Kitagawa S: Phorbol myristate acetate potentiates superoxide release and membrane depolarization without affecting an increase in cytoplasmic free calcium in human granulocytes stimulated by the chemotactic peptide, lectins and the calcium ionophore. *Biochim Biophys Acta* 1988; 941:19-30

92. Berger M, Birx DL, Wetzler EM, O'Shea JJ, Brown EJ, Cross AS: Calcium requirements for increased complement receptor expression during neutrophil activation. *J Immunol* 1985; 135:1342-8

93. Haines KA, Reibman J, Callegari PE, Abramson SB, Philips MR, Weissmann G: Cocaine and its derivatives blunt neutrophil functions without influencing phosphorylation of a 47-kilodalton component of the reduced nicotinamide-adenine dinucleotide phosphate oxidase. *J Immunol* 1990; 144:4757-64

94. Rabinovitch M, DeStefano M: Cell to substrate adhesion and spreading: Inhibition by cationic anesthetics. *J Cell Physiol* 1975; 85:189-93

95. Goldstein IM, Lind S, Hoffstein S, Weissmann G: Influence of local anesthetics upon human polymorphonuclear leukocyte function in vitro: Reduction of lysosomal enzyme release and superoxide anion production. *J Exp Med* 1977; 146:483-94

96. Cullen BF, Haschke RH: Local anesthetic inhibition of phagocytosis and metabolism of human leukocytes. *ANESTHESIOLOGY* 1974; 40:142-6

97. Nicolson GL, Smith JR, Poste G: Effects of local anesthetics on cell morphology and membrane-associated cytoskeletal organization in BALB/3T3 cells. *J Cell Biol* 1976; 68:395-402

98. Rabinovitch M, DeStefano MJ: Cell shape changes induced by cationic anesthetics. *J Exp Med* 1976; 143:290-304

99. Hammer R, Dahlgren C, Stendahl O: Inhibition of human leukocyte metabolism and random mobility by local anaesthesia. *Acta Anaesthesiol Scand* 1985; 29:520-3

100. Schreiner A, Hopfen G: Adhesion and locomotion of human leukocytes in vitro: importance of protein coating; effect of lidocaine, ethanol and endotoxin. *Acta Pathol Microbiol Scand C* 1979; 87:333-40

101. Eriksson AS, Sinclair R, Cassuto J, Thomsen P: Influence of lidocaine on leukocyte function in the surgical wound. *ANESTHESIOLOGY* 1992; 77:74-8

102. Dickstein R, Kiremidjian-Schumacher L, Stotzky G: Effect of lidocaine on production of migration inhibitory factor and on macrophage motility: In vitro exposure of guinea pig lymphocytes and macrophages. *J Leukocyte Biol* 1984; 36:621-32

103. Poste G, Papahadjopoulos D, Nicolson GL: Local anesthetics affect transmembrane cytoskeletal control of mobility and distribution of cell surface receptors. *Proc Natl Acad Sci U S A* 1975; 72:4430-4

104. Volpi M, Sha, Epstein PM, Andrenyak DM, Feinstein MB: Local anesthetics, mepacrine, and propranolol are antagonists of calmodulin. *Proc Natl Acad Sci U S A* 1981; 78:795-9

105. Davies B, Guyuron B, Husami T: The role of lidocaine, epinephrine, and flap elevation in wound healing after chemical peel. *Ann Plast Surg* 1991; 26:273-8

106. Vasseur PB, Paul HA, Dybdal N, Crumley L: Effects of local anesthetics on healing of abdominal wounds in rabbits. *Am J Vet Res* 1984; 45:2385-8

107. Kanta J, Kopacova L, Patockova M, Bartos F: Effect of carbamate local anesthetics on granulation tissue formation. *Pol J Pharmacol Pharm* 1984; 36:659-63

108. Scott BD, Shasby DM, Tomanek RJ, Kieso RA, Seabold JE, Pont JA, Kerber RE: Lidocaine and dextran sulfate inhibit leukocyte accumulation but not postischemic contractile dysfunction in a canine model. *Am Heart J* 1993; 125:1002-11

109. Giddon DB, Lindhe J: In vivo quantitation of local anesthetic suppression of leukocyte adherence. *Am J Pathol* 1972; 68:327-38

110. Condliffe AM, Kitchen E, Chilvers ER: Neutrophil priming: Pathophysiological consequences and underlying mechanisms. *Clin Sci* 1998; 94:461-71

111. Fischer LG, Conrad B, Krumm B, Hollmann MW, Durieux MJ: Time-dependent attenuation by lidocaine of respiratory burst in human neutrophils primed with lysophosphatic acid. *Anesth Analg* 2000; 90:S405

112. Irita K, Fujita I, Takeshige K, Minakami S, Yoshitake J: Cinchocaine and amethocaine inhibit activation and activity of superoxide production in human neutrophils. *Br J Anaesth* 1986; 58:639-45

113. Kai T, Nishimura J, Kobayashi S, Takahashi S, Yoshitake J, Kanaide H: Effects of lidocaine on intracellular Ca<sup>2+</sup> and tension in airway smooth muscle. *ANESTHESIOLOGY* 1993; 78:954-65

114. Tomoda MK, Tsuchiya M, Ueda W, Hirakawa M, Utsumi K: Lidocaine inhibits stimulation-coupled responses of neutrophils and protein kinase C activity. *Physiol Chem Phys Med NMR* 1990; 22:199-210

115. Siminiak T, Wysocki H, Veit A, Maurer HR: The effect of selected antiarrhythmic drugs on neutrophil free oxygen radicals production measured by chemiluminescence. *Basic Res Cardiol* 1991; 86:355-62

116. White IW, Gelb AW, Wexler HR, Stiller CR, Keown PA: The effects of intravenous anaesthetic agents on human neutrophil chemiluminescence. *Can Anaesth Soc J* 1983; 30:506-11

117. Hyvonen PM, Kowolik MJ: Dose-dependent suppression of the neutrophil respiratory burst by lidocaine. *Acta Anaesthesiol Scand* 1998; 42:565-9

118. Cederholm I, Briheim G, Rutberg H, Dahlgren C: Effects of five amino-amide local anesthetic agents on human polymorphonuclear leukocytes measured by chemiluminescence. *Acta Anaesthesiol Scand* 1994; 38:704-10

119. Mikawa K, Akamatsu H, Nishina K, Shiga M, Maekawa N, Obara H, Niwa Y: Inhibitory effect of local anaesthetics on reactive oxygen species production by human neutrophils. *Acta Anaesthesiol Scand* 1997; 41:524-8

120. Kubes P, Suzuki M, Granger DN: Nitric oxide: An endogenous modulator of leukocyte adhesion. *Proc Natl Acad Sci U S A* 1991; 88:4651-5



121. Nishida J, McCuskey RS, McDonnell D, Fox ES: Protective role of NO in hepatic microcirculatory dysfunction during endotoxemia. *Am J Physiol* 1994; 267:G1135-41
122. Mikawa K, Nishina K, Tamada M, Takao Y, Maekawa N, Obara H: Aminoguanidine attenuates endotoxin-induced acute lung injury in rabbits. *Crit Care Med* 1998; 26:905-11
123. Tassiopoulos AK, Hakim TS, Finck CM, Pedoto A, Hodell MG, Landas SK, McGraw DJ: Neutrophil sequestration in the lung following acute aortic occlusion starts during ischaemia and can be attenuated by tumour necrosis factor and nitric oxide blockade. *Eur J Vasc Endovasc Surg* 1998; 16:36-42
124. Mamiya K, Tomoda MK, Edashige K, Ueda W, Manabe M: Local anesthetics enhance nitric oxide production by human peripheral neutrophils. *Physiol Chem Phys Med NMR* 1995; 27:111-9
125. Ogata K, Shinohara M, Inoue H, Miyata T, Yoshioka M, Ohura K: Effects of local anesthetics on rat macrophage phagocytosis. *Nippon Yakurigaku Zasshi* 1993; 101:53-8
126. Okuno S, Noda H, Kugimiya T, Saionji K: The influence of local anesthetics on human leukocyte functions studied by micro whole blood collection and flowcytometry. *Masui* 1996; 45:317-25
127. Hille B: Local anesthetics: Hydrophilic and hydrophobic pathways for the drug-receptor reaction. *J Gen Physiol* 1977; 69:497-515
128. Bidani A, Heming TA: Effects of lidocaine on cytosolic pH regulation and stimulus-induced effector functions in alveolar macrophages. *Lung* 1997; 175:349-61
129. Wiecek K, Hollmann MW, Graf BM, Martin E, Durieux ME: Local anesthetics inhibit lysophosphatidate signaling time- and pH dependent. *Anesthesiologie und Intensivmedizin* 2000; 41:385
130. Nietgen GW, Chan CK, Durieux ME: Inhibition of lysophosphatidate signaling by lidocaine and bupivacaine. *ANESTHESIOLOGY* 1997; 86:1112-9
131. Sullivan LM, Hoenemann CW, Arledge JAM, Durieux ME: Synergistic inhibition of lysophosphatidic acid signaling by charged and uncharged local anesthetics. *Anesth Analg* 1999; 88:1117-24
132. Hoenemann CW, Podranski T, Lo B, Yanovitch M, Durieux ME: Local anesthetic effects on thromboxane A2 signaling. *ANESTHESIOLOGY* 1998; 89:A886
133. Hollmann MW, Berger A, Fischer LG, Durieux ME: Lysophosphatidate and muscarinic m1 receptor signaling is mediated by different G-protein alpha subunits. *Anesth Analg* 2000; 90:S426
134. Olschewski A, Hempelmann G, Vogel W, Safronov BV: Blockade of Na<sup>+</sup> and K<sup>+</sup> currents by local anesthetics in the dorsal horn neurons of the spinal cord. *ANESTHESIOLOGY* 1998; 88:172-9
135. Aguilar JS, Criado M, De Roberts E: Inhibition by local anesthetics, phentolamine and propranolol of [H]Quinicyclidinyl benzylate binding to central muscarinic receptors. *Eur J Pharmacol* 1980; 68:317-26
136. Bittencourt AL, Takahashi RN: Mazindol and lidocaine are antinociceptives in the mouse formalin model: involvement of dopamine receptor. *Eur J Pharmacol* 1997; 330:109-13
137. Szekeres L, Papp JG: Antiarrhythmic compounds. *Prog Drug Res* 1968; 12:292-369
138. Morris T, Appby R: Retardation of wound healing by procaine. *Br J Surg* 1980; 67:391-2
139. Chvapil M, Hameroff SP, O'Dea K, Peacock EE: Local anesthetics and wound healing. *J Surg Res* 1979; 27:367-71
140. Drucker M, Cardenas E, Arizti P, Valenzuela A, Gamboa A: Experimental studies on the effect of lidocaine on wound healing. *World J Surg* 1998; 22:394-7
141. Eriksson AS, Sinclair R, Cassuto J, Thomsen P: Influence of lidocaine on leukocyte function in the surgical wound. *ANESTHESIOLOGY* 1992; 77:74-8
142. Cooke ED, Bowcock SA, Lloyd MJ, Pilcher MF: Intravenous lignocaine in prevention of deep venous thrombosis after elective hip surgery. *Lancet* 1977; 2:797-9
143. Modig J, Borg T, Karlstrom G, Maripuu E, Sahlstedt B: Thromboembolism after total hip replacement: role of epidural and general anesthesia. *Anesth Analg* 1983; 62:174-80
144. Henny CP, Odoom JA, TenCate JW, TenCate RJF, Osterhoff NF, Dabhoiwala NF, Sih IL: Effects of extradural bupivacaine on the hemostatic system. *Br J Anaesth* 1986; 58:301-5
145. Tuman KJ, McCarthy RJ, March RJ, DeLaria GA, Patel RV, Ivankovich AD: Effects of epidural anesthesia and analgesia on coagulation and outcome after major vascular surgery. *Anesth Analg* 1991; 73:696-704
146. Luostarinen V, Evers H, Lyytikainen MT, Scheinin, Wahlen A: Antithrombotic effects of lidocaine and related compounds on laser induced microvascular injury. *Acta Anaesthesiol Scand* 1981; 25:9-14
147. Stewart GJ: Antithrombotic activity of local anesthetics in several canine models. *Reg Anesth* 1982; 7:89-96
148. Feinstein MG, Fiekers J, Fraser C: An analysis of the mechanism of local anesthetic inhibition of platelet aggregation and secretion. *J Pharmacol Exp Ther* 1976; 197:215-28
149. Kohrs R, Hoenemann CW, Feirer N, Durieux ME: Bupivacaine inhibits whole blood coagulation in vitro. *Reg Anesth Pain Med* 1999; 24:326-30
150. Borg T, Modig J: Potential anti-thrombotic effects of local anesthetics due to their inhibition of platelet aggregation. *Acta Anaesthesiol Scand* 1985; 29:739-42
151. Odoom JA, Sturk A, Dokter PWC, Bovill JG, TenCate JW, Oosting J: The effects of bupivacaine and pipecoloxylidide on platelet function in vitro. *Acta Anaesthesiol Scand* 1989; 33:385-8
152. Gibbs NM, Sear JW: Effect of ketorolac, bupivacaine, and low dose heparin on thrombelastographic variables in vitro. *Br J Anaesth* 1995; 75:27-30
153. Steinbach AB: Alteration by xylocaine (lidocaine) and its derivatives of the time course of the end plate potential. *J Gen Physiol* 1968; 52:144-61
154. Neher E, Steinbach JH: Local anaesthetics transiently block currents through single acetylcholine-receptor channels. *J Physiol* 1978; 277:153-76
155. Ruff RL: The kinetics of local anesthetic blockade of end-plate channels. *Biophys J* 1982; 37:625-31
156. Frelin C, Vigne P, Lazdunski M: Biochemical evidence for pharmacological similarities between alpha-adrenoreceptors and voltage-dependent Na<sup>+</sup> and Ca<sup>++</sup> channels. *Biochem Biophys Res Commun* 1982; 106:967-73
157. Palade PT, Almers W: Slow calcium and potassium currents in frog skeletal muscle: their relationship and pharmacologic properties. *Pflugers Arch* 1985; 405:91-101
158. Graham JH, Maher JR, Robinson SE: The effect of cocaine and other local anesthetics on central dopaminergic neurotransmission. *J Pharmacol Exp Ther* 1995; 274:707-17
159. Granger P, Biton B, Faure C, Vige X, Depoortere H, Graham D, Langer SZ, Scatton B, Avenet P: Modulation of the gamma-aminobutyric acid type A receptor by the antiepileptic drugs carbamazepine and phenytoin. *Mol Pharmacol* 1995; 47:1189-96
160. Nordmark J, Rydqvist B: Local anaesthetics potentiate GABA-

## LOCAL ANESTHETICS AND THE INFLAMMATORY RESPONSE

mediated  $\text{Cl}^-$  currents by inhibiting GABA uptake. *Neuroreport* 1997; 8:465-8

161. Craviso GL, Musacchio JM: Competitive inhibition of stereospecific opiate binding by local anesthetics in mouse brain. *Life Sci* 1975; 16:1803-8

162. Fairhurst AS, Whittaker ML, Ehlert FJ: Interactions of D600 (methoxyverapamil) and local anesthetics with rat brain  $\alpha$ -adren-  
ergic and muscarinic receptors. *Biochem Pharmacol* 1980; 29:155-62

163. Fields JZ, Roeske WR, Morkin E, Yamamura HI: Cardiac muscarinic cholinergic receptors: biochemical identification and characterization. *J Biol Chem* 1978; 253:3251-8

164. Li YM, Wingrove DE, Too HP, Marnerakis M, Stimson ER, Strichartz GR, Maggio JE: Local anesthetics inhibit substance P binding and evoked increases in intracellular  $\text{Ca}^{2+}$ . *ANESTHESIOLOGY* 1995; 82:166-73

165. Liu K, Adachi N, Yanase H, Kataoka K, Arai T: Lidocaine suppresses the anoxic depolarization and reduces the increase in the intracellular  $\text{Ca}^{2+}$  concentration in gerbil hippocampal neurons. *ANESTHESIOLOGY* 1997; 87:1470-8

166. Chen J, Adachi N, Liu K, Nagaro T, Arai T: Improvement of ischemic damage in gerbil hippocampal neurons by procaine. *Brain Res* 1998; 792:16-23

167. Schurr A, Spears B, Reid KH, West CA, Edmonds HLJ, Rigor BM: Lidocaine depresses synaptic activity in the rat hippocampal slice. *ANESTHESIOLOGY* 1986; 64:501-3

168. Fujitani T, Adachi N, Miyazaki H, Liu K, Nakamura Y, Kataoka K, Arai T: Lidocaine protects hippocampal neurons against ischemic damage by preventing increase of extracellular excitatory amino acids: a microdialysis study in Mongolian gerbils. *Neurosci Lett* 1994; 179:91-4

169. Muir JK, Lyeth BG, Hamm RJ, Ellis EF: The effect of acute cocaine or lidocaine on behavioral function following fluid percussion brain injury in rats. *J Neurotrauma* 1995; 12:87-97

170. Hamm RJ, Temple MD, Pike BR, Ellis EF: The effect of postinjury administration of polyethylene glycol-conjugated superoxide dismutase (pegorgotein, Dismutec) or lidocaine on behavioral function following fluid-percussion brain injury in rats. *J Neurotrauma* 1996; 13:325-32

171. Das KC, Misra HP: Lidocaine: a hydroxyl radical scavenger and singlet oxygen quencher. *Mol Cell Biochem* 1992; 115:179-85

172. Astrup J, Sorensen PM, Sorensen HR: Inhibition of cerebral oxygen and glucose consumption in the dog by hypothermia, pentobarbital, and lidocaine. *ANESTHESIOLOGY* 1981; 55:263-8

173. Brown RH, Robbins W, Staats P, Hirshman C: Prevention of bronchoconstriction by an orally active local anesthetic. *Am J Respir Crit Care Med* 1995; 151:1239-43

174. Groeben H, Silvanus MT, Beste M, Peters J: Both intravenous and inhaled lidocaine attenuate reflex bronchoconstriction but at different plasma concentrations. *Am J Respir Crit Care Med* 1999; 159:530-5

175. Groeben H, Foster WM, Brown RH: Intravenous lidocaine and oral mexiletine block reflex bronchoconstriction in asthmatic subjects [see comments]. *Am J Respir Crit Care Med* 1996; 154:885-8

176. Groeben H, Schwalen A, Irsfeld S, Stieglitz S, Lipfert P, Hopf HB: Intravenous lidocaine and bupivacaine dose-dependently attenuate bronchial hyperreactivity in awake volunteers. *ANESTHESIOLOGY* 1996; 84:533-9

177. Dunst MN, Margolin K, Horak D: Lidocaine for severe hiccups. *N Engl J Med* 1993; 329:890-1

178. Neeno TA, Rosenow EC: Intractable hiccups. Consider nebulized lidocaine. *Chest* 1996; 110:1129-30

179. Shiomi Y, Nagamine T, Fujiki N, Hirano S, Naito Y, Shibasaki H, Honjo I: Tinnitus remission by lidocaine demonstrated by auditory evoked magnetoencephalogram: a preliminary report. *Acta Otolaryngol* 1997; 117:31-4
